# Supplementary material for: The Association of Irritant Administration Via Midline Catheters with Catheter-related Complications: A Longitudinal Cohort Study
Source: Research Square preprint supplement (doi:10.21203/rs.3.rs-6591574/v1), 2025-06-11

**Supplementary Material**

**The Association of Irritant Administration Via Midline Catheters with Catheter-related Complications: A Longitudinal Cohort Study**

**CONTENTS**

**Table S1.** Phlebitis scale.

**Table S2.** Infiltration scale.

**Table S3.** List of irritants identified in the included patients.

**Table S4.** Multivariable logistic regression analyses of factors associated with catheter-related complication after propensity score matching.

**Table S5.** Sensitivity analyses of orthopedic patients.


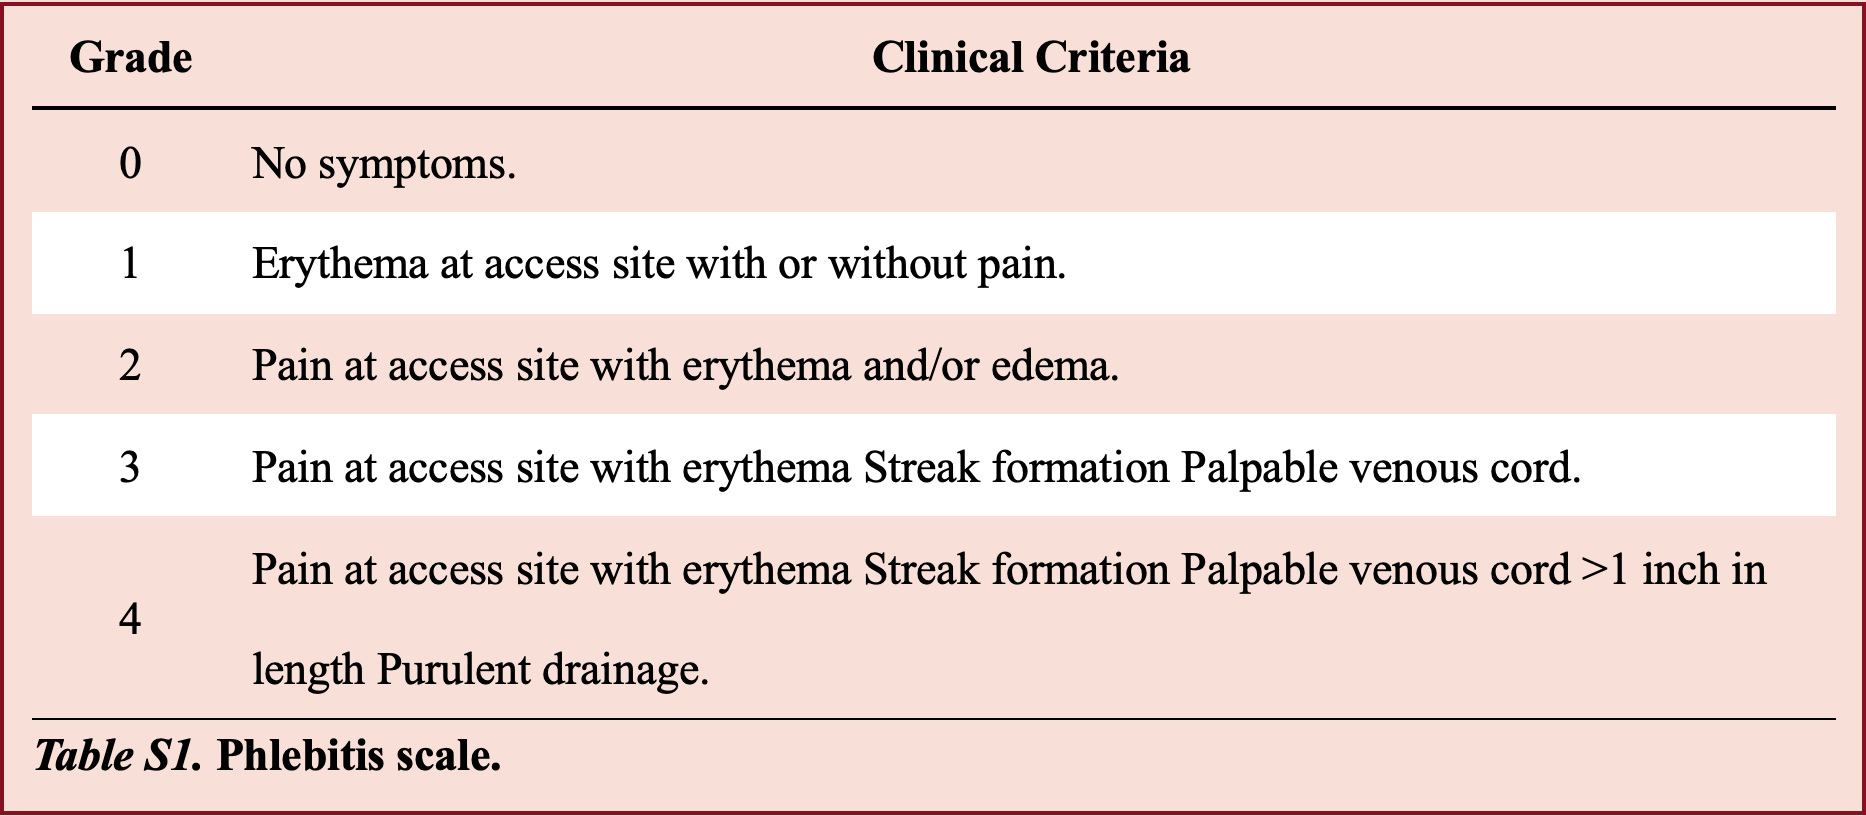


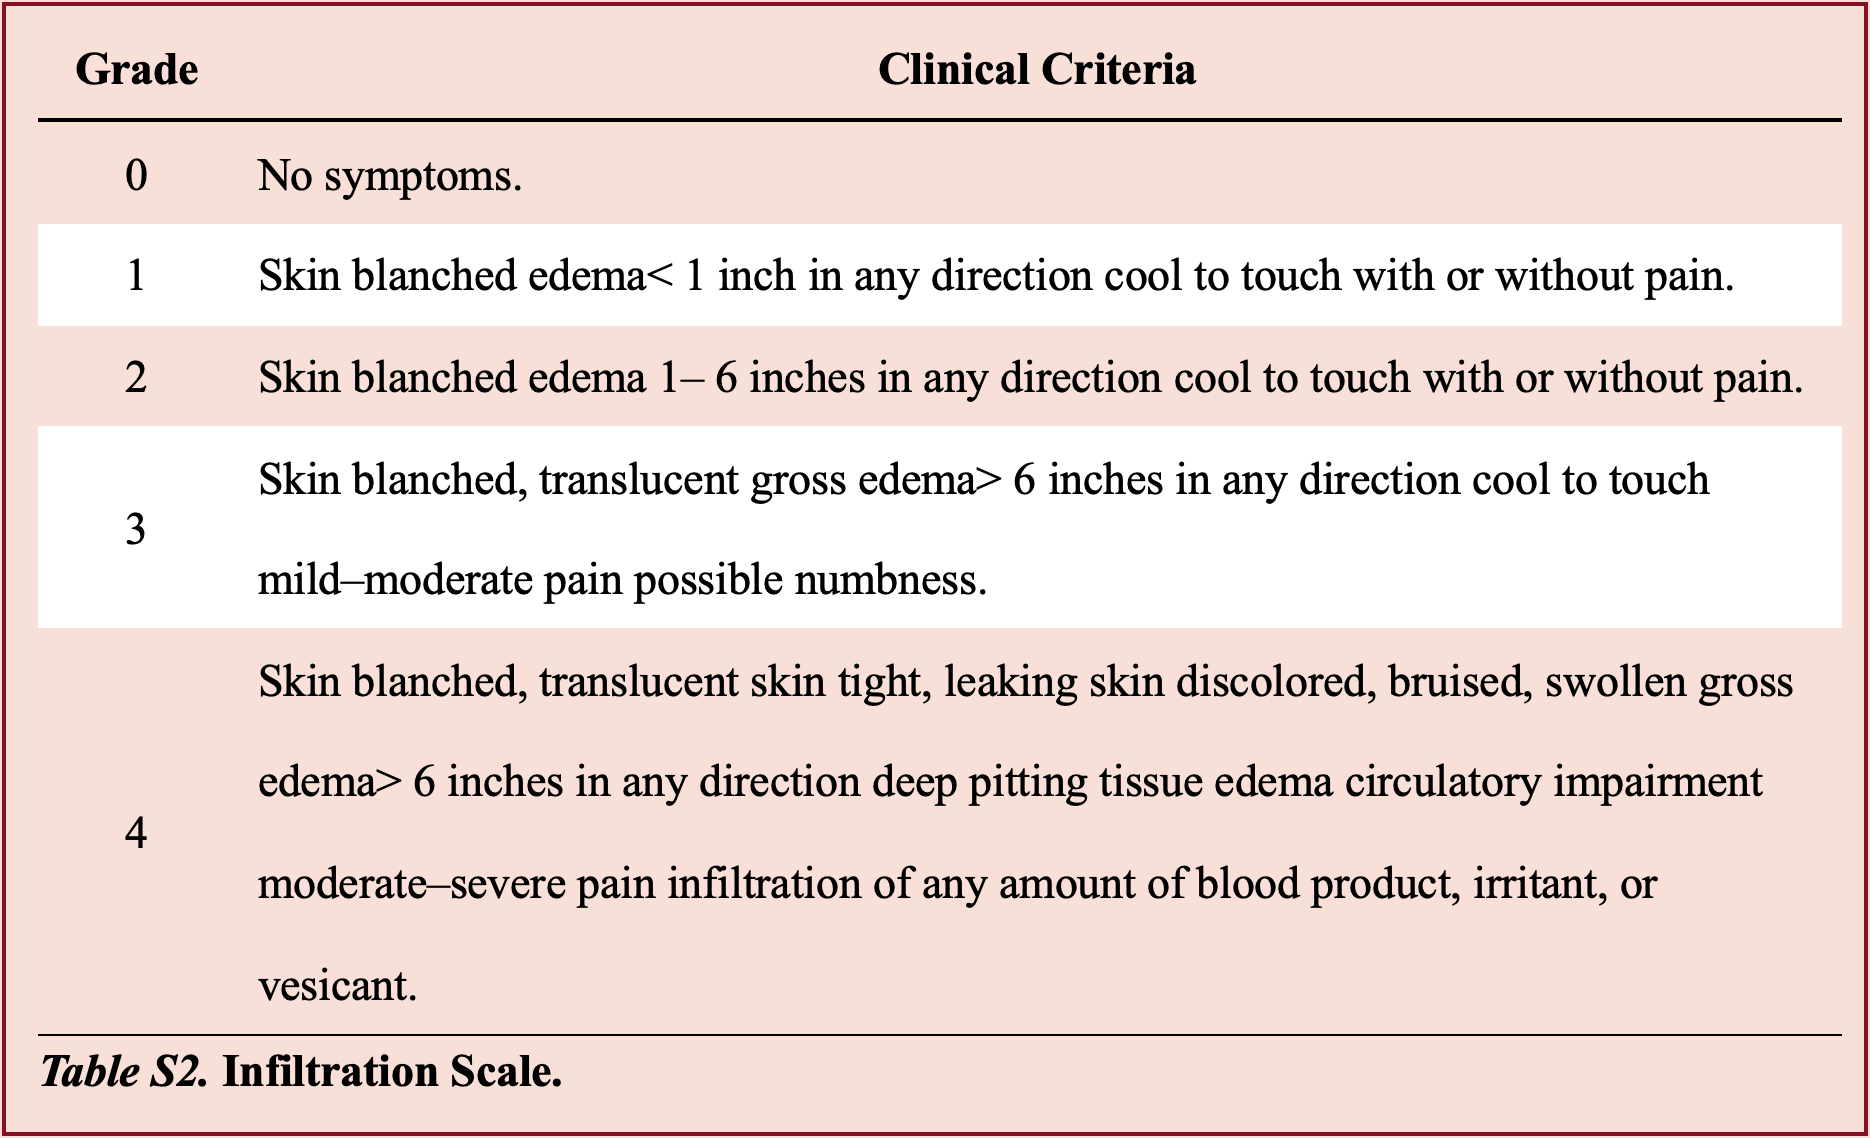


***Table S3*.** List of irritants identified in the included patients.

| Classification | Drug (Brand Name) | Diluent | Basis for inclusion | Reference(s) |
| --- | --- | --- | --- | --- |
| Anti-infective drugs | Acyclovir | NS | PH> 9 | 20, 21 |
| Amikacin | NS | PH< 5 | 20 |
| Cefepime | NS | PH< 5 | 20 |
| Cefazolin | NS | PH< 5 | 20 |
| Ciprofloxacin | NA | PH< 5 | 20, 21 |
| Cisatracurium | NS | PH< 5 | 20 |
| Daptomycin | NS | PH< 5 | 20 |
| Ganciclovir | NS | PH> 9 | 20 |
| Linezolid | NA | PH< 5 | 20 |
| Vancomycin | NS/ 5% GS | PH< 5 | 20, 21 |
| Antiarrhythmics | Amiodarone | 5% GS | PH< 5 | 20, 21 |
| Esmolol | NA | pH＜5 | 22 |
| Digestive-related drugs | Omeprazole | NS | PH> 9 | 20 |
| Ondansetron | NS | PH< 5 | 20 |
| Vasoactive drugs | Milrinone | NS | PH< 5 | 20 |
| Urapidil | NS | Osmolarity > 600 mOSM/L | 20 |
| Dobutamine | NS | PH< 5 | 20, 21 |
| Dopamine | NS | PH< 5 | 20, 21 |
| Epinephrine | 5% GS | PH< 5 | 20, 21 |
| Nimodipine | NA | Osmolarity > 600 mOSM/L | 20 |
| Nitroglycerin | NS | Osmolarity > 600 mOSM/L | 20 |
| Norepinephrine | 5% GS | PH< 5 | 20, 21 |
| Remifentanil | NS | PH< 5 | 20 |
| Nicardipine | NS | NA | 21 |
| Sedatives and analgesics | Valproic acid | NS | Osmolarity > 600 mOSM/L | 20 |
| Midazolam | NS | PH< 5 | 20 |
| Diazepam | NA | NA | 21 |
| Other drugs | Iron sucrose | NS | PH> 9 | 20 |
| Vasopressin (mannitol et.c) | NA | Osmolarity > 600 mOSM/L | 20, 21 |
| Potassium chloride | NS | PH< 5 | 20, 21 |
| Rocuronium | NS | PH< 5 | 20 |
| Sodium Bicarbonate | NA | Osmolarity > 600 mOSM/L | 20, 21 |
| Calcium chloride | NS | PH< 5 | 20, 21 |
| Insulin human regular | 5% GS | PH< 5 | 20 |
| Sodium Chloride (≥2%) | NA | NA | 21 |
| PN | NA | NA | 21 |

**Abbreviation:** 5%GS, 5% glucose solution; NA, not available; NS, normal saline; PN, parenteralnutrition; Osmolarity expressed in mOsm/L.


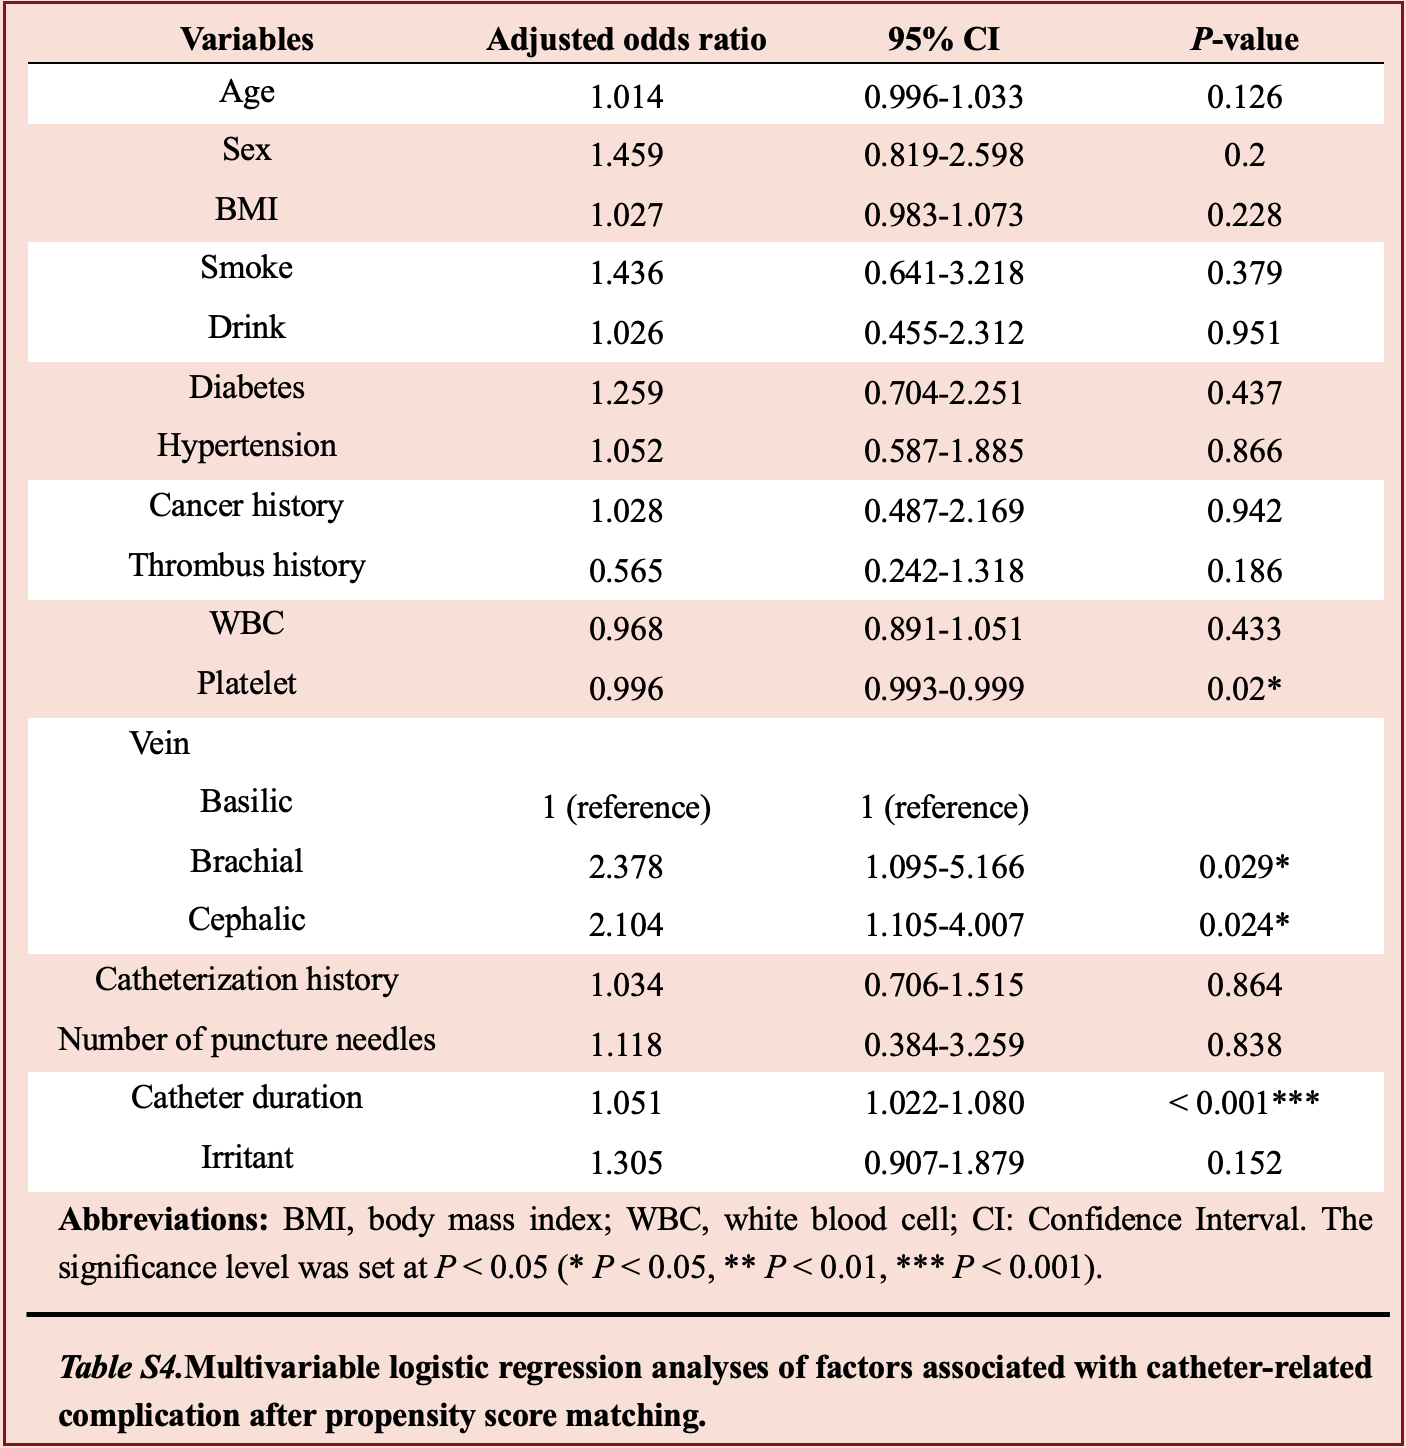


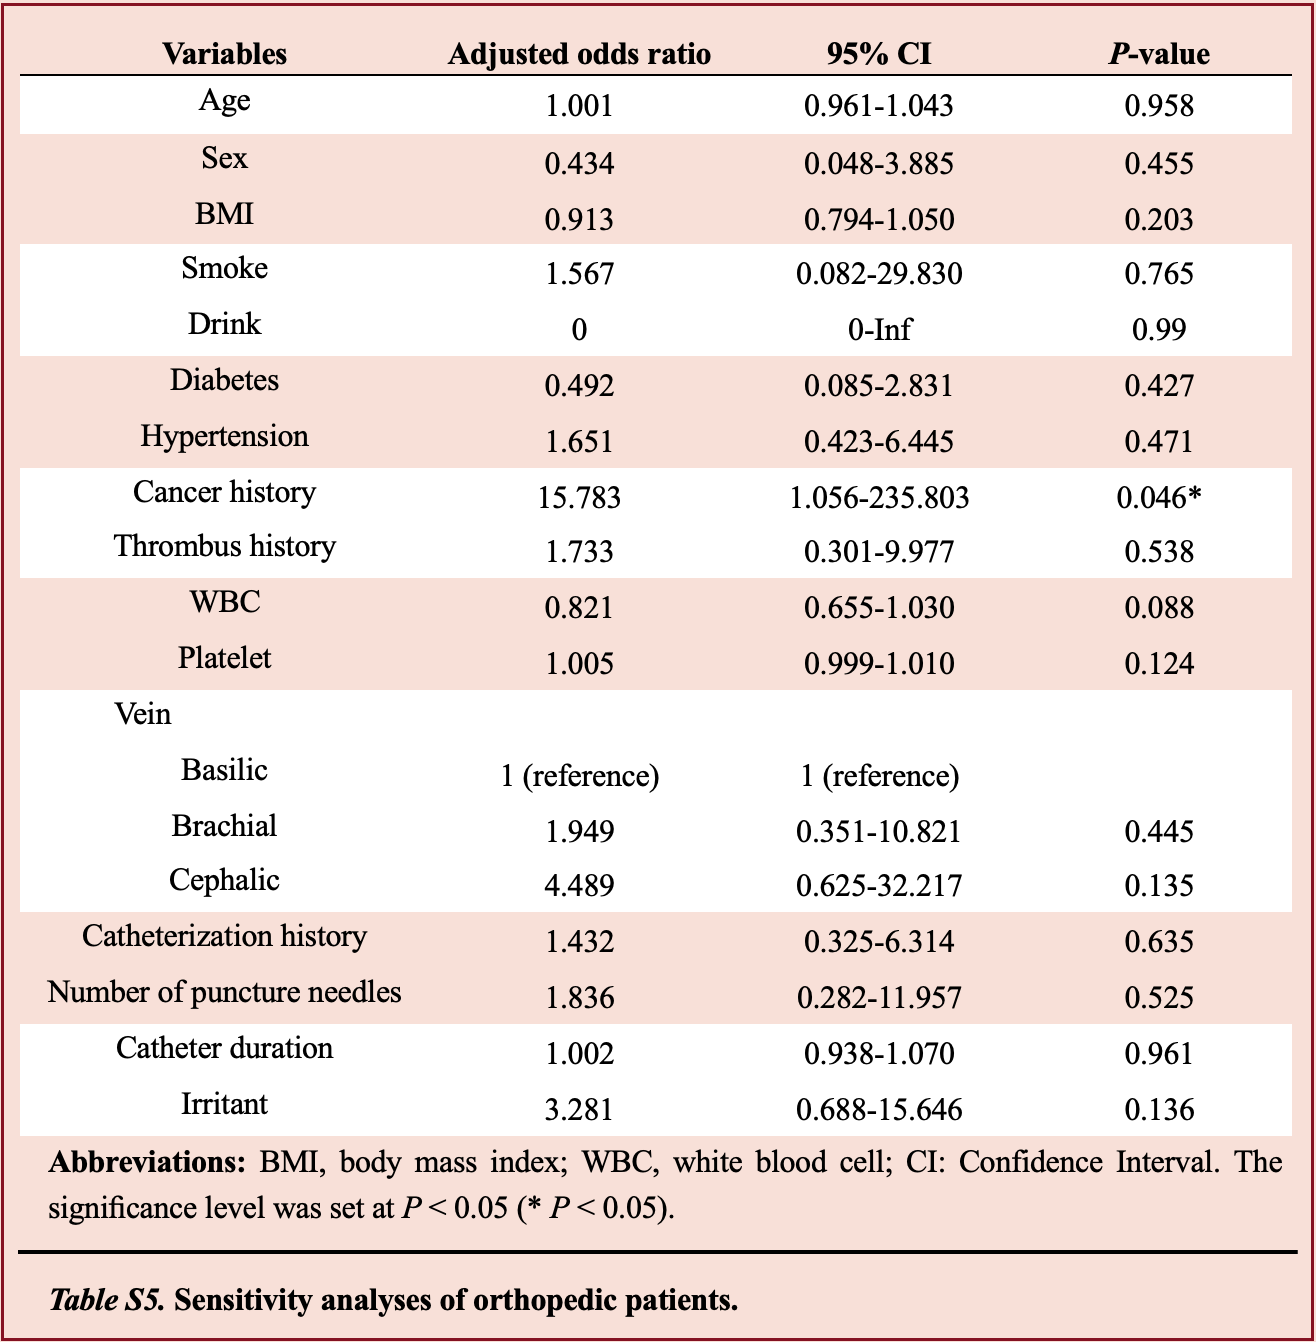

Supplement: Supplementary file 1 [file 9cd1424b89074565c09dcc3a.docx]
